# Supplementary material
Source: PubMed Central journal article supplement (PMC2993460)

**Ecto-5'-Nucleotidase (NT5E) and Thiopurine Cellular Circulation:  
Association with Cytotoxicity**

Fang Li, Brooke L. Fridley, Alice Matimba, Krishna R. Kalari, Linda Pelleymounter, Irene Moon, Yuan Ji, Gregory D. Jenkins, Anthony Batzler, Liewei Wang, Richard M. Weinshilboum  
**Drug Metabolism and Disposition**

**Supplemental Table 1.** *NT5E* resequencing primers.

| Gene Region | Forward Primer                         | Reverse Primer           |
|-------------|----------------------------------------|--------------------------|
| 5'UTR       | tgtaaacgacggccagtGACAAAGGGAATGTGTGAGGA | TAATGTCATGCTTTGCAAGGTT   |
| 5'UTR       | ATAAGGCAATATGGGTGATGG                  | GGCAGAGAGGAGGAGTAAAGA    |
| 5'UTR       | GATTTTACCCAATCGTGTTTC                  | GTGAACTGGGTGCGAAAGC      |
| Exon 1      | CGGGAACAACCTCTCCACTCT                  | CTTCTACGCACCCACCTTA      |
| Exon 2      | CAGGTGAGGAGGACACAAAATC                 | GTTCACTGAGCAGAAGAGGACA   |
| Exon 3      | AAACAATATCTGAAGCCTCCTCAC               | TGCACATGTTCCCATTTAATGTAT |
| Exon 4      | GGATACTCTTCACGGCGTTC                   | AAGAAGCAAGTGGGGCTTTT     |
| Exon 5      | CCACTAATGCTGTCCAGGT                    | CAAGCCATCTTCCACCTAA      |
| Exon 6      | AGGAGGGGGAAATAAGAGTTTG                 | GTGTGTCCTTCAGGCTAGGTTT   |
| Exon 7      | TTCCTTCCTCAGTGTGTCAGG                  | CACAGCCATTAAGGGTAAGGT    |
| Exon 8      | CCAGTGTTTCTCATATGTCCTGTA               | GTTTTGTCTCTGGGGTTGGA     |
| Exon 9      | ACACATTTTACATCTGGAGCATGA               | ACTAGGTTGCTGACCCTGAGTAAT |

**Supplemental Table 2.** SNP correlations with *NT5E* expression. **(A)** SNPs from the *NT5E* resequencing analysis; **(B)** Hapmap SNPs; **(C)** Imputed SNPs. The correlations are based on 287 cell lines, for SNPs in and near the *NT5E* gene. The SNPs have been correlated with *NT5E* expression determined with Affymetrix probeset 203939\_at. MAF=minor allele frequencies for combined populations (AA, EA and HCA).

**(A)** SNPs from the *NT5E* resequencing analysis

| SNP        | Chr position | NT5E probe | Correlation | P-value                   | MAF   |
|------------|--------------|------------|-------------|---------------------------|-------|
| rs9450278  | 86215061     | 203939_at  | -0.3760     | 2.350 x 10 <sup>-10</sup> | 0.186 |
| rs9450279  | 86215943     | 203939_at  | -0.3515     | 4.290 x 10 <sup>-9</sup>  | 0.191 |
| rs4599602  | 86215137     | 203939_at  | -0.3521     | 4.290 x 10 <sup>-9</sup>  | 0.188 |
| rs4458647  | 86215224     | 203939_at  | -0.3517     | 4.830 x 10 <sup>-9</sup>  | 0.189 |
| rs3812139  | 86253709     | 203939_at  | -0.3092     | 2.410 x 10 <sup>-7</sup>  | 0.179 |
| rs4463232  | 86214879     | 203939_at  | -0.3089     | 2.740 x 10 <sup>-7</sup>  | 0.16  |
| rs2229524  | 86255962     | 203939_at  | -0.3073     | 3.190 x 10 <sup>-7</sup>  | 0.172 |
| rs2295890  | 86216181     | 203939_at  | -0.2831     | 3.09 x 10 <sup>-6</sup>   | 0.179 |
| rs9450282  | 86252017     | 203939_at  | 0.1949      | 1.403 x 10 <sup>-3</sup>  | 0.451 |
| I1p103     | 86217018     | 203939_at  | -0.1400     | 2.263 x 10 <sup>-2</sup>  | 0.011 |
| m637       | 86215940     | 203939_at  | -0.1241     | 4.357 x 10 <sup>-2</sup>  | 0.009 |
| I6m371     | 86256574     | 203939_at  | 0.1234      | 4.595 x 10 <sup>-2</sup>  | 0.027 |
| m85        | 86216492     | 203939_at  | 0.1170      | 5.818 x 10 <sup>-2</sup>  | 0.002 |
| I2p53      | 86233772     | 203939_at  | 0.1154      | 5.921 x 10 <sup>-2</sup>  | 0.012 |
| rs35478984 | 86251817     | 203939_at  | 0.1083      | 7.664 x 10 <sup>-2</sup>  | 0.024 |
| I7m81      | 86258333     | 203939_at  | 0.1011      | 9.917 x 10 <sup>-2</sup>  | 0.002 |
| m93        | 86216484     | 203939_at  | 0.0983      | 1.119 x 10 <sup>-1</sup>  | 0.002 |
| I5p160     | 86254086     | 203939_at  | -0.0907     | 1.393 x 10 <sup>-1</sup>  | 0.005 |
| I8m101     | 86260177     | 203939_at  | 0.0900      | 1.416 x 10 <sup>-1</sup>  | 0.009 |
| rs2229523  | 86255952     | 203939_at  | 0.0872      | 1.562 x 10 <sup>-1</sup>  | 0.239 |
| rs41271619 | 86256868     | 203939_at  | 0.0813      | 1.854 x 10 <sup>-1</sup>  | 0.012 |
| rs2065114  | 86215862     | 203939_at  | 0.0813      | 1.878 x 10 <sup>-1</sup>  | 0.239 |
| rs60666442 | 86255885     | 203939_at  | 0.0799      | 1.933 x 10 <sup>-1</sup>  | 0.157 |
| I7p11      | 86257105     | 203939_at  | -0.0751     | 2.211 x 10 <sup>-1</sup>  | 0.002 |
| I7p12      | 86257106     | 203939_at  | -0.0751     | 2.211 x 10 <sup>-1</sup>  | 0.002 |
| I4m350     | 86253422     | 203939_at  | -0.0748     | 2.242 x 10 <sup>-1</sup>  | 0.002 |
| rs9450284  | 86256048     | 203939_at  | -0.0733     | 2.336 x 10 <sup>-1</sup>  | 0.481 |
| rs35694460 | 86233685     | 203939_at  | -0.0717     | 2.421 x 10 <sup>-1</sup>  | 0.023 |
| m1364      | 86215213     | 203939_at  | -0.0698     | 2.576 x 10 <sup>-1</sup>  | 0.002 |
| I2m194     | 86237480     | 203939_at  | 0.0689      | 2.621 x 10 <sup>-1</sup>  | 0.005 |
| E2p342     | 86233499     | 203939_at  | 0.0660      | 2.818 x 10 <sup>-1</sup>  | 0.019 |
| m930       | 86215647     | 203939_at  | 0.0660      | 2.841 x 10 <sup>-1</sup>  | 0.002 |
| E6p1207    | 86256033     | 203939_at  | 0.0654      | 2.877 x 10 <sup>-1</sup>  | 0.002 |
| m824       | 86215753     | 203939_at  | 0.0631      | 3.062 x 10 <sup>-1</sup>  | 0.002 |
| E2p555     | 86233712     | 203939_at  | -0.0616     | 3.152 x 10 <sup>-1</sup>  | 0.002 |
| rs34160251 | 86260304     | 203939_at  | -0.0592     | 3.342 x 10 <sup>-1</sup>  | 0.003 |

|            |          |           |         |                          |       |
|------------|----------|-----------|---------|--------------------------|-------|
| m1855      | 86214722 | 203939_at | 0.0588  | 3.395 x 10 <sup>-1</sup> | 0.002 |
| E1p141     | 86216717 | 203939_at | 0.0531  | 3.895 x 10 <sup>-1</sup> | 0.002 |
| rs10565593 | 86215149 | 203939_at | 0.0529  | 3.938 x 10 <sup>-1</sup> | 0.358 |
| E7p1221    | 86256955 | 203939_at | 0.0513  | 4.038 x 10 <sup>-1</sup> | 0.002 |
| rs10944129 | 86237645 | 203939_at | 0.0495  | 4.201 x 10 <sup>-1</sup> | 0.378 |
| m417       | 86216160 | 203939_at | 0.0473  | 4.422 x 10 <sup>-1</sup> | 0.007 |
| I1p13      | 86216928 | 203939_at | 0.0474  | 4.422 x 10 <sup>-1</sup> | 0.007 |
| rs58285927 | 86260060 | 203939_at | -0.0471 | 4.500 x 10 <sup>-1</sup> | 0.031 |
| rs10944128 | 86237451 | 203939_at | 0.0423  | 4.907 x 10 <sup>-1</sup> | 0.375 |
| I1m26      | 86233471 | 203939_at | 0.0399  | 5.154 x 10 <sup>-1</sup> | 0.002 |
| m1271      | 86215306 | 203939_at | -0.0387 | 5.307 x 10 <sup>-1</sup> | 0.004 |
| I3m225     | 86251447 | 203939_at | 0.0289  | 6.412 x 10 <sup>-1</sup> | 0.014 |
| E1p184     | 86216760 | 203939_at | -0.0271 | 6.611 x 10 <sup>-1</sup> | 0.002 |
| m1407      | 86215170 | 203939_at | -0.0235 | 7.036 x 10 <sup>-1</sup> | 0.011 |
| I5p87      | 86254013 | 203939_at | 0.0217  | 7.240 x 10 <sup>-1</sup> | 0.002 |
| m220       | 86216357 | 203939_at | 0.0191  | 7.579 x 10 <sup>-1</sup> | 0.002 |
| I3m109     | 86251563 | 203939_at | -0.0175 | 7.757 x 10 <sup>-1</sup> | 0.002 |
| E1p167     | 86216743 | 203939_at | 0.0164  | 7.899 x 10 <sup>-1</sup> | 0.002 |
| I5m117     | 86255814 | 203939_at | -0.0137 | 8.249 x 10 <sup>-1</sup> | 0.005 |
| m1570      | 86215007 | 203939_at | 0.0134  | 8.274 x 10 <sup>-1</sup> | 0.002 |
| I6p33      | 86256069 | 203939_at | -0.0130 | 8.327 x 10 <sup>-1</sup> | 0.002 |
| I4m209     | 86253563 | 203939_at | -0.0129 | 8.330 x 10 <sup>-1</sup> | 0.002 |
| I2p37      | 86233756 | 203939_at | 0.0100  | 8.703 x 10 <sup>-1</sup> | 0.002 |
| rs6919558  | 86216095 | 203939_at | 0.0091  | 8.824 x 10 <sup>-1</sup> | 0.016 |
| m77        | 86216500 | 203939_at | 0.0081  | 8.956 x 10 <sup>-1</sup> | 0.002 |
| I6m79      | 86256866 | 203939_at | 0.0056  | 9.270 x 10 <sup>-1</sup> | 0.096 |
| m1551      | 86215026 | 203939_at | 0.0055  | 9.283 x 10 <sup>-1</sup> | 0.004 |
| I1m14      | 86233483 | 203939_at | 0.0038  | 9.505 x 10 <sup>-1</sup> | 0.003 |
| I4p70      | 86251939 | 203939_at | -0.0038 | 9.510 x 10 <sup>-1</sup> | 0.002 |
| m1368      | 86215209 | 203939_at | 0.0026  | 9.669 x 10 <sup>-1</sup> | 0.002 |
| E4p840     | 86251760 | 203939_at | 0.0003  | 9.962 x 10 <sup>-1</sup> | 0.002 |
| m79        | 86216498 | 203939_at | 0.0001  | 9.985 x 10 <sup>-1</sup> | 0.004 |

**(B)** Hapmap SNPs.

| <b>dbSNP ID</b> | <b>Chr position</b> | <b>NT5E probe</b> | <b>Correlation</b> | <b>P-value</b>           | <b>MAF</b> |
|-----------------|---------------------|-------------------|--------------------|--------------------------|------------|
| rs12055597      | 86194552            | 203939_at         | -0.3047            | 3.640 x 10 <sup>-7</sup> | 0.199      |
| rs9353319       | 86289262            | 203939_at         | -0.3005            | 5.370 x 10 <sup>-7</sup> | 0.134      |
| rs7745560       | 86345640            | 203939_at         | -0.3005            | 5.370 x 10 <sup>-7</sup> | 0.134      |
| rs9450286       | 86265244            | 203939_at         | -0.2968            | 7.470 x 10 <sup>-7</sup> | 0.143      |
| rs3812137       | 86273344            | 203939_at         | -0.2847            | 2.170 x 10 <sup>-6</sup> | 0.134      |
| rs1570311       | 86211870            | 203939_at         | -0.2839            | 2.320 x 10 <sup>-6</sup> | 0.167      |
| rs4487548       | 86199130            | 203939_at         | -0.2839            | 2.320 x 10 <sup>-6</sup> | 0.167      |
| rs9344525       | 86208157            | 203939_at         | -0.2839            | 2.320 x 10 <sup>-6</sup> | 0.167      |
| rs6913634       | 86260682            | 203939_at         | -0.2841            | 2.390 x 10 <sup>-6</sup> | 0.128      |
| rs6910543       | 86285460            | 203939_at         | -0.2767            | 4.260 x 10 <sup>-6</sup> | 0.125      |
| rs7771366       | 86348630            | 203939_at         | -0.2690            | 8.010 x 10 <sup>-6</sup> | 0.134      |
| rs9450294       | 86307149            | 203939_at         | -0.2690            | 8.010 x 10 <sup>-6</sup> | 0.134      |
| rs4400191       | 86222521            | 203939_at         | -0.2670            | 9.370 x 10 <sup>-6</sup> | 0.152      |
| rs7753022       | 86233344            | 203939_at         | -0.2604            | 1.570 x 10 <sup>-5</sup> | 0.171      |
| rs4373339       | 86230763            | 203939_at         | -0.2477            | 4.140 x 10 <sup>-5</sup> | 0.155      |
| rs9359655       | 86228662            | 203939_at         | -0.2335            | 1.141 x 10 <sup>-4</sup> | 0.167      |
| rs9362215       | 86193152            | 203939_at         | -0.2193            | 3.059 x 10 <sup>-4</sup> | 0.075      |
| rs6942065       | 86224984            | 203939_at         | -0.2080            | 6.118 x 10 <sup>-4</sup> | 0.157      |
| rs7775864       | 86304478            | 203939_at         | 0.2015             | 9.307 x 10 <sup>-4</sup> | 0.481      |
| rs7771612       | 86321093            | 203939_at         | 0.2018             | 9.322 x 10 <sup>-4</sup> | 0.481      |
| rs6909767       | 86284828            | 203939_at         | 0.1989             | 1.160 x 10 <sup>-3</sup> | 0.484      |
| rs9344533       | 86292907            | 203939_at         | 0.1827             | 2.677 x 10 <sup>-3</sup> | 0.481      |
| rs727870        | 86187875            | 203939_at         | -0.1809            | 2.962 x 10 <sup>-3</sup> | 0.2        |
| rs632163        | 86178781            | 203939_at         | -0.1747            | 4.334 x 10 <sup>-3</sup> | 0.167      |
| rs7742691       | 86335410            | 203939_at         | 0.1713             | 5.425 x 10 <sup>-3</sup> | 0.45       |
| rs494562        | 86173848            | 203939_at         | -0.1604            | 8.539 x 10 <sup>-3</sup> | 0.171      |
| rs640093        | 86172585            | 203939_at         | -0.1604            | 8.903 x 10 <sup>-3</sup> | 0.174      |
| rs4441928       | 86298613            | 203939_at         | 0.1561             | 1.050 x 10 <sup>-2</sup> | 0.324      |
| rs9294335       | 86183399            | 203939_at         | -0.1537            | 1.173 x 10 <sup>-2</sup> | 0.169      |
| rs7753711       | 86187418            | 203939_at         | -0.1429            | 1.923 x 10 <sup>-2</sup> | 0.164      |
| rs7765636       | 86193380            | 203939_at         | 0.1346             | 2.753 x 10 <sup>-2</sup> | 0.258      |
| rs987892        | 86106589            | 203939_at         | -0.1302            | 3.309 x 10 <sup>-2</sup> | 0.429      |
| rs4593336       | 86238650            | 203939_at         | 0.1227             | 4.482 x 10 <sup>-2</sup> | 0.479      |
| rs9362203       | 86139457            | 203939_at         | -0.1226            | 4.489 x 10 <sup>-2</sup> | 0.183      |
| rs313240        | 86116176            | 203939_at         | 0.1230             | 4.626 x 10 <sup>-2</sup> | 0.076      |
| rs4707190       | 86105759            | 203939_at         | -0.1146            | 6.105 x 10 <sup>-2</sup> | 0.418      |

|            |          |           |         |                        |       |
|------------|----------|-----------|---------|------------------------|-------|
| rs313243   | 86113502 | 203939_at | 0.1142  | $6.189 \times 10^{-2}$ | 0.077 |
| rs6931295  | 86201594 | 203939_at | 0.1135  | $6.722 \times 10^{-2}$ | 0.238 |
| rs4707207  | 86242062 | 203939_at | 0.1062  | $8.260 \times 10^{-2}$ | 0.235 |
| rs11753050 | 86161175 | 203939_at | 0.1010  | $1.014 \times 10^{-1}$ | 0.2   |
| rs2842608  | 86352577 | 203939_at | 0.0988  | $1.067 \times 10^{-1}$ | 0.265 |
| rs494688   | 86156808 | 203939_at | -0.0986 | $1.071 \times 10^{-1}$ | 0.129 |
| rs3812138  | 86255952 | 203939_at | 0.0964  | $1.154 \times 10^{-1}$ | 0.239 |
| rs6454463  | 86135253 | 203939_at | -0.0961 | $1.173 \times 10^{-1}$ | 0.351 |
| rs2842613  | 86362421 | 203939_at | 0.0945  | $1.237 \times 10^{-1}$ | 0.253 |
| rs2842609  | 86353507 | 203939_at | 0.0957  | $1.258 \times 10^{-1}$ | 0.243 |
| rs2758840  | 86361344 | 203939_at | 0.0907  | $1.387 \times 10^{-1}$ | 0.249 |
| rs2842612  | 86359810 | 203939_at | 0.0907  | $1.387 \times 10^{-1}$ | 0.249 |
| rs7452605  | 86297670 | 203939_at | 0.0907  | $1.387 \times 10^{-1}$ | 0.249 |
| rs9344532  | 86290789 | 203939_at | 0.0907  | $1.387 \times 10^{-1}$ | 0.249 |
| rs9362230  | 86361732 | 203939_at | 0.0907  | $1.387 \times 10^{-1}$ | 0.249 |
| rs4351223  | 86294516 | 203939_at | 0.0907  | $1.394 \times 10^{-1}$ | 0.248 |
| rs9450269  | 86171403 | 203939_at | -0.0887 | $1.485 \times 10^{-1}$ | 0.131 |
| rs6922     | 86262042 | 203939_at | 0.0820  | $1.809 \times 10^{-1}$ | 0.251 |
| rs9450270  | 86171485 | 203939_at | -0.0811 | $1.913 \times 10^{-1}$ | 0.186 |
| rs12201128 | 86120126 | 203939_at | -0.0797 | $1.935 \times 10^{-1}$ | 0.341 |
| rs653241   | 86173251 | 203939_at | 0.0783  | $2.015 \times 10^{-1}$ | 0.172 |
| rs9362197  | 86128476 | 203939_at | -0.0769 | $2.098 \times 10^{-1}$ | 0.228 |
| rs313242   | 86114087 | 203939_at | 0.0708  | $2.489 \times 10^{-1}$ | 0.175 |
| rs9444340  | 86156532 | 203939_at | 0.0688  | $2.617 \times 10^{-1}$ | 0.364 |
| rs1407447  | 86103634 | 203939_at | 0.0687  | $2.624 \times 10^{-1}$ | 0.368 |
| rs184332   | 86170494 | 203939_at | -0.0662 | $2.804 \times 10^{-1}$ | 0.389 |
| rs9362210  | 86175447 | 203939_at | 0.0635  | $3.007 \times 10^{-1}$ | 0.221 |
| rs10498955 | 86150906 | 203939_at | 0.0618  | $3.175 \times 10^{-1}$ | 0.168 |
| rs4626396  | 86325758 | 203939_at | -0.0617 | $3.191 \times 10^{-1}$ | 0.089 |
| rs12527778 | 86311241 | 203939_at | -0.0609 | $3.206 \times 10^{-1}$ | 0.089 |
| rs3900740  | 86357570 | 203939_at | 0.0598  | $3.302 \times 10^{-1}$ | 0.156 |
| rs512365   | 86103257 | 203939_at | 0.0562  | $3.594 \times 10^{-1}$ | 0.204 |
| rs505923   | 86124266 | 203939_at | 0.0548  | $3.714 \times 10^{-1}$ | 0.455 |
| rs313156   | 86100864 | 203939_at | 0.0550  | $3.732 \times 10^{-1}$ | 0.201 |
| rs12190637 | 86354438 | 203939_at | 0.0536  | $3.818 \times 10^{-1}$ | 0.084 |
| rs16876172 | 86162811 | 203939_at | 0.0535  | $3.827 \times 10^{-1}$ | 0.169 |
| rs970568   | 86113446 | 203939_at | -0.0530 | $3.946 \times 10^{-1}$ | 0.203 |
| rs16876113 | 86155942 | 203939_at | -0.0490 | $4.247 \times 10^{-1}$ | 0.218 |

|            |          |           |         |                          |       |
|------------|----------|-----------|---------|--------------------------|-------|
| rs313245   | 86111916 | 203939_at | 0.0493  | 4.337 x 10 <sup>-1</sup> | 0.185 |
| rs487669   | 86102899 | 203939_at | 0.0467  | 4.467 x 10 <sup>-1</sup> | 0.183 |
| rs4296866  | 86336456 | 203939_at | 0.0451  | 4.623 x 10 <sup>-1</sup> | 0.329 |
| rs16876340 | 86281779 | 203939_at | 0.0430  | 4.835 x 10 <sup>-1</sup> | 0.157 |
| rs7740830  | 86319446 | 203939_at | 0.0430  | 4.835 x 10 <sup>-1</sup> | 0.157 |
| rs545969   | 86149598 | 203939_at | -0.0419 | 4.948 x 10 <sup>-1</sup> | 0.192 |
| rs2842611  | 86358753 | 203939_at | 0.0396  | 5.191 x 10 <sup>-1</sup> | 0.395 |
| rs4707202  | 86148443 | 203939_at | -0.0394 | 5.204 x 10 <sup>-1</sup> | 0.22  |
| rs17440806 | 86291554 | 203939_at | 0.0376  | 5.408 x 10 <sup>-1</sup> | 0.122 |
| rs7740378  | 86118498 | 203939_at | -0.0367 | 5.501 x 10 <sup>-1</sup> | 0.204 |
| rs1322410  | 86117899 | 203939_at | -0.0367 | 5.501 x 10 <sup>-1</sup> | 0.204 |
| rs950030   | 86115806 | 203939_at | -0.0367 | 5.501 x 10 <sup>-1</sup> | 0.204 |
| rs2208727  | 86117045 | 203939_at | -0.0367 | 5.501 x 10 <sup>-1</sup> | 0.204 |
| rs1407446  | 86111438 | 203939_at | -0.0367 | 5.501 x 10 <sup>-1</sup> | 0.204 |
| rs17217313 | 86117611 | 203939_at | -0.0367 | 5.501 x 10 <sup>-1</sup> | 0.204 |
| rs969918   | 86108152 | 203939_at | -0.0339 | 5.808 x 10 <sup>-1</sup> | 0.203 |
| rs586364   | 86130426 | 203939_at | 0.0320  | 6.021 x 10 <sup>-1</sup> | 0.327 |
| rs9444331  | 86129281 | 203939_at | 0.0320  | 6.025 x 10 <sup>-1</sup> | 0.161 |
| rs17217341 | 86117674 | 203939_at | -0.0318 | 6.045 x 10 <sup>-1</sup> | 0.206 |
| rs9450288  | 86278305 | 203939_at | 0.0292  | 6.347 x 10 <sup>-1</sup> | 0.376 |
| rs16876230 | 86189082 | 203939_at | 0.0280  | 6.479 x 10 <sup>-1</sup> | 0.166 |
| rs4431401  | 86246239 | 203939_at | 0.0255  | 6.780 x 10 <sup>-1</sup> | 0.366 |
| rs7775853  | 86157635 | 203939_at | -0.0205 | 7.387 x 10 <sup>-1</sup> | 0.416 |
| rs615848   | 86158613 | 203939_at | -0.0197 | 7.489 x 10 <sup>-1</sup> | 0.414 |
| rs9450247  | 86116621 | 203939_at | 0.0196  | 7.513 x 10 <sup>-1</sup> | 0.133 |
| rs9444352  | 86314254 | 203939_at | 0.0190  | 7.565 x 10 <sup>-1</sup> | 0.359 |
| rs6929086  | 86127703 | 203939_at | 0.0187  | 7.612 x 10 <sup>-1</sup> | 0.132 |
| rs597623   | 86156828 | 203939_at | -0.0168 | 7.842 x 10 <sup>-1</sup> | 0.371 |
| rs9450285  | 86264815 | 203939_at | 0.0154  | 8.017 x 10 <sup>-1</sup> | 0.362 |
| rs6454472  | 86280772 | 203939_at | -0.0153 | 8.033 x 10 <sup>-1</sup> | 0.402 |
| rs6911143  | 86278490 | 203939_at | 0.0147  | 8.111 x 10 <sup>-1</sup> | 0.442 |
| rs577388   | 86157551 | 203939_at | -0.0143 | 8.158 x 10 <sup>-1</sup> | 0.369 |
| rs3734442  | 86217988 | 203939_at | -0.0134 | 8.278 x 10 <sup>-1</sup> | 0.185 |
| rs514998   | 86143241 | 203939_at | 0.0050  | 9.353 x 10 <sup>-1</sup> | 0.326 |
| rs2224595  | 86117342 | 203939_at | 0.0028  | 9.639 x 10 <sup>-1</sup> | 0.359 |
| rs9450273  | 86194607 | 203939_at | 0.0028  | 9.642 x 10 <sup>-1</sup> | 0.366 |
| rs9450248  | 86116890 | 203939_at | 0.0021  | 9.724 x 10 <sup>-1</sup> | 0.353 |
| rs7745109  | 86118763 | 203939_at | 0.0015  | 9.808 x 10 <sup>-1</sup> | 0.355 |

|           |          |           |         |                          |       |
|-----------|----------|-----------|---------|--------------------------|-------|
| rs7766485 | 86320274 | 203939_at | -0.0011 | 9.864 x 10 <sup>-1</sup> | 0.368 |
| rs4331953 | 86188080 | 203939_at | 0.0005  | 9.937 x 10 <sup>-1</sup> | 0.057 |

(C) Imputed SNPs.

| dbSNP ID   | Chr position | NT5E probe | Correlation | P-value                  | MAF   |
|------------|--------------|------------|-------------|--------------------------|-------|
| rs7772233  | 86202743     | 203939_at  | 0.3389      | 1.260 x 10 <sup>-8</sup> | 0.187 |
| rs10081139 | 86255962     | 203939_at  | 0.3104      | 2.140 x 10 <sup>-7</sup> | 0.176 |
| rs1590279  | 86195292     | 203939_at  | 0.2985      | 6.410 x 10 <sup>-7</sup> | 0.156 |
| rs9344524  | 86206370     | 203939_at  | 0.2979      | 6.770 x 10 <sup>-7</sup> | 0.157 |
| rs12528808 | 86262363     | 203939_at  | 0.2971      | 7.320 x 10 <sup>-7</sup> | 0.138 |
| rs9344530  | 86248976     | 203939_at  | 0.2907      | 1.280 x 10 <sup>-6</sup> | 0.134 |
| rs9344521  | 86193182     | 203939_at  | 0.2906      | 1.300 x 10 <sup>-6</sup> | 0.165 |
| rs9362213  | 86193126     | 203939_at  | 0.2906      | 1.300 x 10 <sup>-6</sup> | 0.165 |
| rs7754559  | 86191050     | 203939_at  | 0.2902      | 1.350 x 10 <sup>-6</sup> | 0.165 |
| rs1322401  | 86190106     | 203939_at  | 0.2898      | 1.390 x 10 <sup>-6</sup> | 0.165 |
| rs1000633  | 86189472     | 203939_at  | 0.2897      | 1.400 x 10 <sup>-6</sup> | 0.165 |
| rs9362211  | 86189258     | 203939_at  | 0.2894      | 1.450 x 10 <sup>-6</sup> | 0.17  |
| rs6902904  | 86259422     | 203939_at  | 0.2892      | 1.470 x 10 <sup>-6</sup> | 0.129 |
| rs7744309  | 86323201     | 203939_at  | 0.2882      | 1.600 x 10 <sup>-6</sup> | 0.133 |
| rs9344528  | 86219946     | 203939_at  | 0.2865      | 1.850 x 10 <sup>-6</sup> | 0.177 |
| rs6900270  | 86271226     | 203939_at  | 0.2852      | 2.070 x 10 <sup>-6</sup> | 0.167 |
| rs12662033 | 86198397     | 203939_at  | 0.2840      | 2.300 x 10 <sup>-6</sup> | 0.167 |
| rs9362223  | 86249339     | 203939_at  | 0.2839      | 2.320 x 10 <sup>-6</sup> | 0.143 |
| rs9362218  | 86206482     | 203939_at  | 0.2839      | 2.320 x 10 <sup>-6</sup> | 0.167 |
| rs9353315  | 86206657     | 203939_at  | 0.2797      | 3.300 x 10 <sup>-6</sup> | 0.159 |
| rs6930790  | 86276278     | 203939_at  | 0.2774      | 4.020 x 10 <sup>-6</sup> | 0.133 |
| rs4144167  | 86229171     | 203939_at  | 0.2655      | 1.060 x 10 <sup>-5</sup> | 0.18  |
| rs12664908 | 86235381     | 203939_at  | 0.2581      | 1.890 x 10 <sup>-5</sup> | 0.144 |
| rs9359656  | 86236554     | 203939_at  | 0.2578      | 1.930 x 10 <sup>-5</sup> | 0.144 |
| rs12524836 | 86232675     | 203939_at  | 0.2530      | 2.770 x 10 <sup>-5</sup> | 0.154 |
| rs4565270  | 86231169     | 203939_at  | 0.2529      | 2.810 x 10 <sup>-5</sup> | 0.155 |
| rs9450280  | 86226356     | 203939_at  | 0.2387      | 7.920 x 10 <sup>-5</sup> | 0.146 |
| rs521005   | 86173261     | 203939_at  | 0.2082      | 6.029 x 10 <sup>-4</sup> | 0.143 |
| rs9353310  | 86182918     | 203939_at  | 0.2072      | 6.424 x 10 <sup>-4</sup> | 0.143 |
| rs6919207  | 86185990     | 203939_at  | 0.2061      | 6.874 x 10 <sup>-4</sup> | 0.142 |
| rs9444346  | 86222350     | 203939_at  | 0.1948      | 1.352 x 10 <sup>-3</sup> | 0.34  |

|            |          |           |         |                          |       |
|------------|----------|-----------|---------|--------------------------|-------|
| rs9353309  | 86182864 | 203939_at | 0.1781  | 3.442 x 10 <sup>-3</sup> | 0.188 |
| rs6935918  | 86340294 | 203939_at | 0.1752  | 4.012 x 10 <sup>-3</sup> | 0.544 |
| rs520090   | 86173354 | 203939_at | 0.1613  | 8.165 x 10 <sup>-3</sup> | 0.17  |
| rs490079   | 86174318 | 203939_at | 0.1604  | 8.539 x 10 <sup>-3</sup> | 0.171 |
| rs573892   | 86174908 | 203939_at | 0.1604  | 8.539 x 10 <sup>-3</sup> | 0.171 |
| rs573737   | 86174952 | 203939_at | 0.1603  | 8.562 x 10 <sup>-3</sup> | 0.171 |
| rs567686   | 86180883 | 203939_at | 0.1602  | 8.585 x 10 <sup>-3</sup> | 0.171 |
| rs7767626  | 86181113 | 203939_at | 0.1601  | 8.632 x 10 <sup>-3</sup> | 0.171 |
| rs7767800  | 86181245 | 203939_at | 0.1601  | 8.656 x 10 <sup>-3</sup> | 0.171 |
| rs522129   | 86173100 | 203939_at | 0.1597  | 8.831 x 10 <sup>-3</sup> | 0.171 |
| rs522915   | 86173040 | 203939_at | 0.1596  | 8.860 x 10 <sup>-3</sup> | 0.171 |
| rs550499   | 86172321 | 203939_at | 0.1562  | 1.043 x 10 <sup>-2</sup> | 0.172 |
| rs527670   | 86172498 | 203939_at | 0.1560  | 1.053 x 10 <sup>-2</sup> | 0.172 |
| rs638745   | 86172306 | 203939_at | 0.1560  | 1.056 x 10 <sup>-2</sup> | 0.172 |
| rs637346   | 86172001 | 203939_at | 0.1542  | 1.147 x 10 <sup>-2</sup> | 0.182 |
| rs554113   | 86171963 | 203939_at | 0.1538  | 1.169 x 10 <sup>-2</sup> | 0.182 |
| rs9344518  | 86181863 | 203939_at | 0.1537  | 1.173 x 10 <sup>-2</sup> | 0.169 |
| rs1322404  | 86183631 | 203939_at | 0.1535  | 1.189 x 10 <sup>-2</sup> | 0.169 |
| rs1744122  | 86171937 | 203939_at | 0.1533  | 1.198 x 10 <sup>-2</sup> | 0.182 |
| rs1322403  | 86183881 | 203939_at | 0.1532  | 1.206 x 10 <sup>-2</sup> | 0.169 |
| rs7750970  | 86185289 | 203939_at | 0.1450  | 1.755 x 10 <sup>-2</sup> | 0.164 |
| rs4624841  | 86186970 | 203939_at | 0.1442  | 1.815 x 10 <sup>-2</sup> | 0.164 |
| rs4373337  | 86236125 | 203939_at | -0.1369 | 2.505 x 10 <sup>-2</sup> | 0.467 |
| rs9450302  | 86346392 | 203939_at | 0.1287  | 3.528 x 10 <sup>-2</sup> | 0.406 |
| rs6914591  | 86148522 | 203939_at | 0.1239  | 4.269 x 10 <sup>-2</sup> | 0.212 |
| rs17805597 | 86112439 | 203939_at | -0.1194 | 5.095 x 10 <sup>-2</sup> | 0.065 |
| rs683218   | 86175303 | 203939_at | 0.1147  | 6.070 x 10 <sup>-2</sup> | 0.16  |
| rs6454468  | 86207103 | 203939_at | -0.1113 | 6.893 x 10 <sup>-2</sup> | 0.24  |
| rs12197281 | 86152956 | 203939_at | 0.1052  | 8.557 x 10 <sup>-2</sup> | 0.794 |
| rs4235826  | 86241609 | 203939_at | -0.0983 | 1.083 x 10 <sup>-1</sup> | 0.236 |
| rs9444349  | 86268745 | 203939_at | -0.0968 | 1.141 x 10 <sup>-1</sup> | 0.239 |
| rs12199873 | 86351666 | 203939_at | 0.0922  | 1.322 x 10 <sup>-1</sup> | 0.751 |
| rs9294337  | 86305179 | 203939_at | 0.0920  | 1.331 x 10 <sup>-1</sup> | 0.751 |
| rs9353318  | 86288440 | 203939_at | 0.0896  | 1.436 x 10 <sup>-1</sup> | 0.253 |
| rs9450271  | 86171556 | 203939_at | 0.0862  | 1.592 x 10 <sup>-1</sup> | 0.193 |
| rs2104184  | 86135084 | 203939_at | 0.0855  | 1.630 x 10 <sup>-1</sup> | 0.356 |
| rs4304137  | 86274167 | 203939_at | 0.0820  | 1.807 x 10 <sup>-1</sup> | 0.746 |
| rs6454471  | 86271175 | 203939_at | -0.0811 | 1.858 x 10 <sup>-1</sup> | 0.253 |
| rs313202   | 86169457 | 203939_at | 0.0786  | 1.997 x 10 <sup>-1</sup> | 0.198 |



|            |          |           |         |                          |       |
|------------|----------|-----------|---------|--------------------------|-------|
| rs4706236  | 86130569 | 203939_at | 0.0753  | 2.191 x 10 <sup>-1</sup> | 0.634 |
| rs9359652  | 86110761 | 203939_at | -0.0749 | 2.218 x 10 <sup>-1</sup> | 0.345 |
| rs490055   | 86127723 | 203939_at | -0.0665 | 2.780 x 10 <sup>-1</sup> | 0.446 |
| rs4707197  | 86130815 | 203939_at | 0.0632  | 3.026 x 10 <sup>-1</sup> | 0.219 |
| rs172687   | 86169210 | 203939_at | 0.0624  | 3.088 x 10 <sup>-1</sup> | 0.208 |
| rs540822   | 86142707 | 203939_at | 0.0557  | 3.634 x 10 <sup>-1</sup> | 0.194 |
| rs13198956 | 86272616 | 203939_at | -0.0501 | 4.143 x 10 <sup>-1</sup> | 0.159 |
| rs16876341 | 86282390 | 203939_at | 0.0498  | 4.167 x 10 <sup>-1</sup> | 0.086 |
| rs12524265 | 86153992 | 203939_at | 0.0490  | 4.247 x 10 <sup>-1</sup> | 0.218 |
| rs1020423  | 86150775 | 203939_at | 0.0487  | 4.274 x 10 <sup>-1</sup> | 0.218 |
| rs4707213  | 86318105 | 203939_at | -0.0448 | 4.654 x 10 <sup>-1</sup> | 0.157 |
| rs10498954 | 86122273 | 203939_at | 0.0444  | 4.689 x 10 <sup>-1</sup> | 0.208 |
| rs10498953 | 86122010 | 203939_at | 0.0443  | 4.705 x 10 <sup>-1</sup> | 0.208 |
| rs482433   | 86137505 | 203939_at | 0.0414  | 5.002 x 10 <sup>-1</sup> | 0.676 |
| rs1026064  | 86114329 | 203939_at | 0.0399  | 5.157 x 10 <sup>-1</sup> | 0.201 |
| rs4337908  | 86119387 | 203939_at | 0.0384  | 5.317 x 10 <sup>-1</sup> | 0.204 |
| rs1322408  | 86119166 | 203939_at | 0.0383  | 5.321 x 10 <sup>-1</sup> | 0.204 |
| rs1322400  | 86115609 | 203939_at | 0.0367  | 5.501 x 10 <sup>-1</sup> | 0.204 |
| rs1575309  | 86112858 | 203939_at | 0.0367  | 5.501 x 10 <sup>-1</sup> | 0.204 |
| rs17216964 | 86112313 | 203939_at | 0.0367  | 5.501 x 10 <sup>-1</sup> | 0.204 |
| rs2181188  | 86114925 | 203939_at | 0.0367  | 5.501 x 10 <sup>-1</sup> | 0.204 |
| rs2208726  | 86117152 | 203939_at | 0.0367  | 5.501 x 10 <sup>-1</sup> | 0.204 |
| rs4707193  | 86113926 | 203939_at | 0.0367  | 5.501 x 10 <sup>-1</sup> | 0.204 |
| rs5019880  | 86113757 | 203939_at | 0.0367  | 5.501 x 10 <sup>-1</sup> | 0.204 |
| rs5019881  | 86113716 | 203939_at | 0.0367  | 5.501 x 10 <sup>-1</sup> | 0.204 |
| rs5019884  | 86113563 | 203939_at | 0.0367  | 5.501 x 10 <sup>-1</sup> | 0.204 |
| rs970569   | 86113255 | 203939_at | 0.0367  | 5.501 x 10 <sup>-1</sup> | 0.204 |
| rs1853254  | 86109250 | 203939_at | 0.0356  | 5.622 x 10 <sup>-1</sup> | 0.205 |
| rs17440948 | 86323370 | 203939_at | -0.0314 | 6.086 x 10 <sup>-1</sup> | 0.125 |
| rs1026063  | 86114303 | 203939_at | 0.0283  | 6.442 x 10 <sup>-1</sup> | 0.267 |
| rs4707206  | 86235043 | 203939_at | -0.0247 | 6.873 x 10 <sup>-1</sup> | 0.168 |
| rs313199   | 86166419 | 203939_at | 0.0233  | 7.047 x 10 <sup>-1</sup> | 0.415 |
| rs313196   | 86163951 | 203939_at | 0.0227  | 7.111 x 10 <sup>-1</sup> | 0.415 |
| rs10498956 | 86166795 | 203939_at | 0.0208  | 7.347 x 10 <sup>-1</sup> | 0.19  |
| rs626741   | 86158768 | 203939_at | 0.0207  | 7.357 x 10 <sup>-1</sup> | 0.426 |
| rs528426   | 86161188 | 203939_at | 0.0205  | 7.383 x 10 <sup>-1</sup> | 0.416 |
| rs545407   | 86158682 | 203939_at | 0.0204  | 7.392 x 10 <sup>-1</sup> | 0.416 |
| rs4326211  | 86159577 | 203939_at | 0.0204  | 7.398 x 10 <sup>-1</sup> | 0.416 |
| rs645265   | 86160602 | 203939_at | 0.0202  | 7.417 x 10 <sup>-1</sup> | 0.416 |

|            |          |           |         |                          |       |
|------------|----------|-----------|---------|--------------------------|-------|
| rs493641   | 86156960 | 203939_at | 0.0201  | 7.437 x 10 <sup>-1</sup> | 0.416 |
| rs16876114 | 86156062 | 203939_at | 0.0199  | 7.462 x 10 <sup>-1</sup> | 0.19  |
| rs614124   | 86158254 | 203939_at | 0.0177  | 7.729 x 10 <sup>-1</sup> | 0.422 |
| rs9444348  | 86232293 | 203939_at | 0.0175  | 7.759 x 10 <sup>-1</sup> | 0.633 |
| rs645354   | 86160671 | 203939_at | 0.0161  | 7.932 x 10 <sup>-1</sup> | 0.37  |
| rs532366   | 86155057 | 203939_at | 0.0147  | 8.103 x 10 <sup>-1</sup> | 0.369 |
| rs560334   | 86152654 | 203939_at | 0.0143  | 8.155 x 10 <sup>-1</sup> | 0.37  |
| rs4707211  | 86289429 | 203939_at | -0.0091 | 8.817 x 10 <sup>-1</sup> | 0.369 |
| rs12203963 | 86280035 | 203939_at | -0.0073 | 9.050 x 10 <sup>-1</sup> | 0.367 |
| rs313198   | 86166334 | 203939_at | 0.0072  | 9.068 x 10 <sup>-1</sup> | 0.379 |
| rs1322409  | 86118139 | 203939_at | -0.0056 | 9.271 x 10 <sup>-1</sup> | 0.358 |
| rs4706238  | 86178192 | 203939_at | 0.0028  | 9.642 x 10 <sup>-1</sup> | 0.608 |
| rs6908264  | 86110429 | 203939_at | -0.0026 | 9.657 x 10 <sup>-1</sup> | 0.359 |

**Supplemental Table 3.** Summary of *NT5E* SNP correlation with *NT5E* expression (p-value cut off =  $10^{-6}$ ).

| dbSNP ID               | Position | pos rel ATG* | Correlation | P-value                 |
|------------------------|----------|--------------|-------------|-------------------------|
| rs9450278              | 86215061 | -1516        | -0.3760     | $2.349 \times 10^{-10}$ |
| rs9450279              | 86215943 | -634         | -0.3515     | $4.290 \times 10^{-9}$  |
| rs4599602              | 86215137 | -1440        | -0.3521     | $4.292 \times 10^{-9}$  |
| rs4458647              | 86215224 | -1353        | -0.3517     | $4.828 \times 10^{-9}$  |
| rs7772233              | 86202743 | -13834       | -0.3389     | $1.264 \times 10^{-8}$  |
| rs3812139              | 86253709 | 37132        | -0.3092     | $2.407 \times 10^{-7}$  |
| rs4463232              | 86214879 | -1698        | -0.3080     | $2.738 \times 10^{-7}$  |
| rs2229524              | 86255962 | 39385        | -0.3073     | $3.191 \times 10^{-7}$  |
| rs12055597             | 86194552 | -22025       | -0.3047     | $3.640 \times 10^{-7}$  |
| rs9353319              | 86289262 | 72685        | -0.3005     | $5.370 \times 10^{-7}$  |
| rs7745560              | 86345640 | 129063       | -0.3005     | $5.370 \times 10^{-7}$  |
| rs1590279              | 86195292 | -21285       | 0.2985      | $6.415 \times 10^{-7}$  |
| rs9344524              | 86206370 | -10207       | 0.2979      | $6.768 \times 10^{-7}$  |
| rs12528808             | 86262363 | 45786        | 0.2971      | $7.321 \times 10^{-7}$  |
| rs9450286              | 86265244 | 48667        | -0.2968     | $7.470 \times 10^{-7}$  |
| rs9344530              | 86248976 | 32399        | 0.2907      | $1.283 \times 10^{-6}$  |
| rs9344521              | 86193182 | -23395       | 0.2906      | $1.297 \times 10^{-6}$  |
| rs9362213              | 86193126 | -23451       | 0.2906      | $1.299 \times 10^{-6}$  |
| rs7754559              | 86191050 | -25527       | 0.2902      | $1.349 \times 10^{-6}$  |
| rs1322401              | 86190106 | -26471       | 0.2898      | $1.394 \times 10^{-6}$  |
| rs1000633              | 86189472 | -27105       | 0.2897      | $1.403 \times 10^{-6}$  |
| rs9362211              | 86189258 | -27319       | 0.2894      | $1.446 \times 10^{-6}$  |
| rs6902904              | 86259422 | 42845        | 0.2892      | $1.467 \times 10^{-6}$  |
| rs7744309              | 86323201 | 106624       | 0.2882      | $1.600 \times 10^{-6}$  |
| rs9344528              | 86219946 | 3369         | 0.2865      | $1.852 \times 10^{-6}$  |
| rs6900270              | 86271226 | 54649        | 0.2852      | $2.069 \times 10^{-6}$  |
| rs3812137              | 86273344 | 56767        | -0.2847     | $2.170 \times 10^{-6}$  |
| rs12662033             | 86198397 | -18180       | 0.2840      | $2.300 \times 10^{-6}$  |
| rs4487548              | 86199130 | -17447       | -0.2839     | $2.320 \times 10^{-6}$  |
| rs9344525              | 86208157 | -8420        | -0.2839     | $2.320 \times 10^{-6}$  |
| rs1570311              | 86211870 | -4707        | -0.2839     | $2.320 \times 10^{-6}$  |
| rs9362223              | 86249339 | 32762        | 0.2839      | $2.321 \times 10^{-6}$  |
| rs9362218              | 86206482 | -10095       | 0.2839      | $2.324 \times 10^{-6}$  |
| rs6913634              | 86260682 | 44105        | -0.2841     | $2.390 \times 10^{-6}$  |
| rs2295890 <sup>†</sup> | 86216181 | -396         | -0.2831     | $3.093 \times 10^{-6}$  |
| rs9353315              | 86206657 | -9920        | 0.2797      | $3.303 \times 10^{-6}$  |
| rs6930790              | 86276278 | 59701        | 0.2774      | $4.018 \times 10^{-6}$  |
| rs6910543              | 86285460 | 68883        | -0.2767     | $4.260 \times 10^{-6}$  |
| rs9450294              | 86307149 | 90572        | -0.2690     | $8.010 \times 10^{-6}$  |
| rs7771366              | 86348630 | 132053       | -0.2690     | $8.010 \times 10^{-6}$  |
| rs4400191              | 86222521 | 5944         | -0.2670     | $9.370 \times 10^{-6}$  |

# Ethnic-Specific 6-MP and 6-TG IC<sub>50</sub> Values

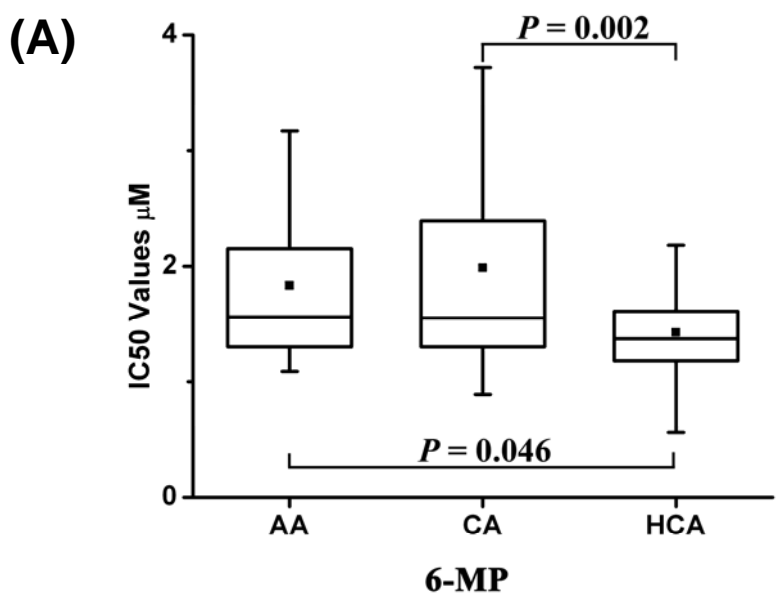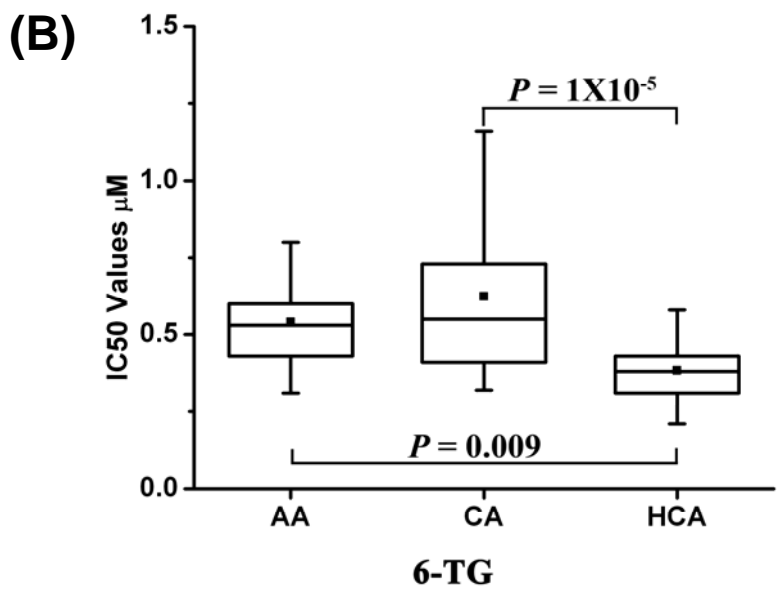

Supplement: supp_110.035220_DMD35220Supplementary_Tables_and_Figure.pdf [file supp_110.035220_DMD35220Supplementary_Tables_and_Figure.pdf]
